# Supplementary material
Source: publisher figshare collection journal article supplement (https://karger.figshare.com/ndownloader/files/16250219)
Supplement: Supplementary file 1 [file 16250219]

**Drug use and**

**prevention programs**

**in the Berlin party scene**

**Paper-and-pen questionnaire**

**
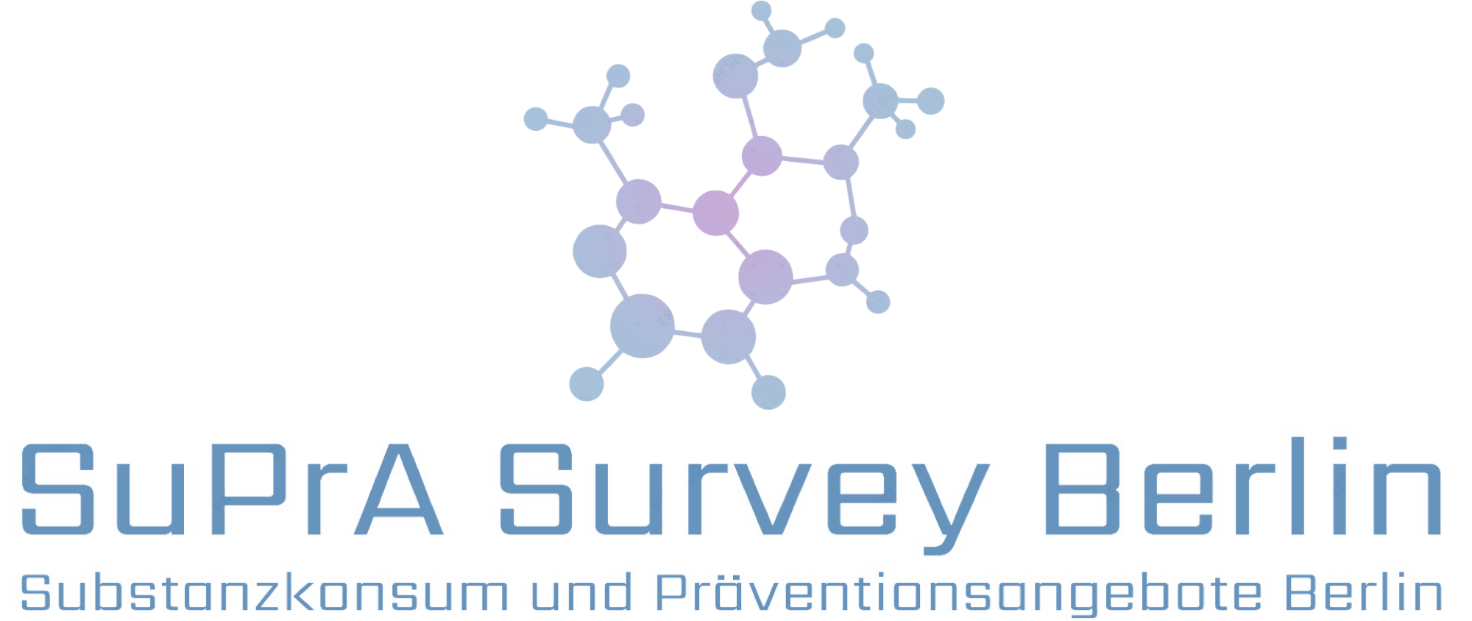
**

Dear participant,

thank you for your participation in our survey. We aim to find out if there is need for more support concerning drug use in the Berlin party scene (education, counseling, "drug checking", etc.). In order to adapt to your needs, we will ask some questions about yourself and your drug use.

Even if you do not use illegal drugs you can fill out this questionnaire.

We assure you that your **anonymity** will be preserved at all times. Your answers will not be linked to your name or email address.

The completion of this questionnaire should take no more than 5-10 minutes.

At the end of the questionnaire you will receive some information on drug use in Berlin. In addition, **10 Amazon gift cards with a worth of €20 each** will be raffled off among all participants.

By completing the questionnaire, you confirm and agree to the further processing and evaluation of your anonymously collected data.

1. Please specify your age in years.

**2. Please specify your Sex.**

| Female 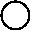 |
| --- |
| Male 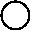 |
| 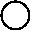 Other: |

**3. Please specify your current type of stay in Berlin.**

| Living in Berlin (minimum 4 weeks stay necessary) 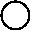 |
| --- |
| Tourist 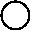 |
| 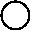 Other: |

**4. Please specify your highest successfully completed level of education.**

| No educational qualifications 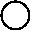 |
| --- |
| School (to age 16) 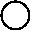 |
| School (to age 18) 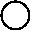 |
| Vocational training 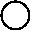 |
| University degree 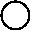 |

**5. What is your current occupation?**

| School 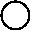 |
| --- |
| Apprenticeship 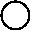 |
| Study 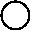 |
| Employed 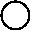 |
| Self-employed 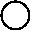 |
| Unemployed 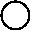 |
| 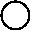 Other: |

**6. What sexual orientation do you identify with?**

| 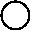 Heterosexual |
| --- |
| 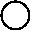 Homosexual |
| 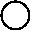 Bisexual |
| 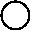 Other: |

**7. Have you ever used one of the following drugs?**

Please mark where applicable. Multiple answers possible.

Please do NOT state medication prescribed by a physician.

|  | Within the last month | Within the last 12 months | Once  already | Never |
| --- | --- | --- | --- | --- |
| Cocaine | 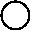 | 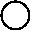 | 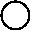 | 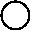 |
| Amyl nitrites (Poppers, Snappers) | 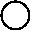 | 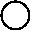 | 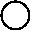 | 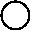 |
| GHB/GBL ("G", Liquid Ecstasy, Gamma) | 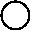 | 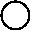 | 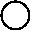 | 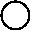 |
| Amphetamine (Speed, Fet, Powder) | 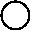 | 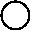 | 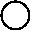 | 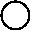 |
| Alpha-Ciatylglutarate | 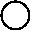 | 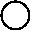 | 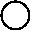 | 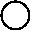 |
| Benzodiazepines (Valium®, Xanax®, Ativan®) | 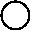 | 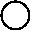 | 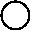 | 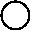 |
| Methamphetamine (Crystal Meth, Ice) | 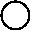 | 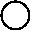 | 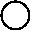 | 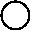 |
| Opiate based painkillers  (Oxycodone, Hydromorphone) | 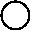 | 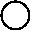 | 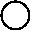 | 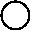 |
| Neuro Enhancer (Adderal®) | 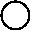 | 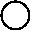 | 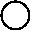 | 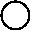 |
| Cannabis (Pot, Marijuana, Weed) | 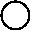 | 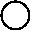 | 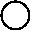 | 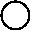 |
| Heroin | 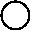 | 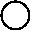 | 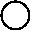 | 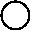 |
| Methanoltenside | 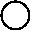 | 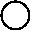 | 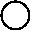 | 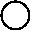 |
| MDMA (Ecstasy, XTC, Molly) | 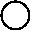 | 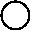 | 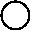 | 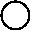 |
| LSD (Acid) | 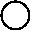 | 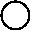 | 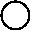 | 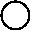 |
| Alcohol | 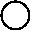 | 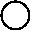 | 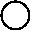 | 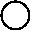 |
| Synthetic cathinones ("Bath Salts",  MMC, MDMC, MDPV) | 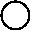 | 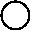 | 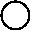 | 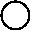 |
| Ketamine ("K", "Special K") | 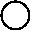 | 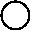 | 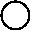 | 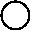 |
| Synthetic cannabinoids ("Spice") | 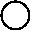 | 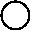 | 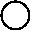 | 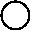 |
| Psilocybin (Magic Mushrooms, Shrooms) | 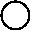 | 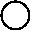 | 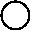 | 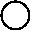 |

**8. Please name – if applicable – any other drugs you have used.**

9. Which three drugs – other than alcohol and nicotine – do you use most frequently?

(1 = the most)

1.

2.

3.

**Why do you use them?**

Please refer to the order of your most frequently used drugs.

Drug No. 1

Drug No. 2

Drug No. 3

**At what age did you first use them?**

Please refer to the order of your most frequently used drugs.

Drug No. 1

Drug No. 2

Drug No. 3

**10. Do you want to reduce your use of drug 1-3 in the coming 12 months?**

Please refer to the order of your most frequently used drugs.

|  | Yes | No |  |
| --- | --- | --- | --- |
| Drug No. 1 | 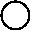 |  |  |
| Drug No. 2 |  |  |  |
| Drug No. 3 |  |  |  |

**11. How do you assess the general impact of another person if she/he**

Explanation: **occasionally** = once a month or less, **regularly** = once a week or more

|  | Very  negative |  |  | Very  positive |
| --- | --- | --- | --- | --- |
| …occasionally uses Amphetamine (Speed, Powder)? |  |  |  |  |
| …regularly uses Amphetamine (Speed, Powder)? |  |  |  |  |
| …occasionally uses GHB/GBL (“G”, Liquid Ecstasy)? |  |  |  |  |
| …regularly uses GHB/GBL (“G”, Liquid Ecstasy)? |  |  |  |  |
| …occasionally uses MDMA (Ecstasy, XTC, Molly)? |  |  |  |  |
| …regularly uses MDMA (Ecstasy, XTC, Molly)? |  |  |  |  |
| …occasionally uses Ketamine (“K”, “Special K”)? |  |  |  |  |
| …regularly uses Ketamine (“K”, “Special K”)? |  |  |  |  |
| …occasionally uses Cocaine? |  |  |  |  |
| …regularly uses Cocaine? |  |  |  |  |
| …occasionally uses Cannabis (Pot, Marijuana, Weed)? |  |  |  |  |
| …regularly uses Cannabis (Pot, Marijuana, Weed)? |  |  |  |  |
| …occasionally drinks Alcohol? |  |  |  |  |
| …regularly drinks Alcohol? |  |  |  |  |

12. Have you ever felt like you ought to cut down on your drinking or drug use?

| Yes |
| --- |
| No |
|  |

**13. Have you ever been annoyed by people criticizing your drinking or drug use?**

| Yes |
| --- |
| No |

**14. Have you ever felt bad or guilty about your drinking or drug use?**

| Yes |
| --- |
| No |

**15. Have you ever had a drink or used drugs first thing in the morning to steady your nerves, e.g. get rid of a hangover, or get the day started?**

| Yes |
| --- |
| No |

**16. Have you ever been diagnosed with any psychiatric condition (including addiction disorders)?**

| No |
| --- |
| Yes, which?: |

**17. Do you feel the need for or are you interested in advice on handling your drug use?**

| Yes |
| --- |
| No |

**18. Please rate on the following scale how reasonable you consider the given prevention/ help programs.**

|  | Not reasonable  at all | | | Very  reasonable | | Don’t know |
| --- | --- | --- | --- | --- | --- | --- |
| permanent consulting centers in Berlin  which offer free drug counselling if required |  |  |  |  |  |  |
| (Mobile) drug checking for purity (pill testing) |  |  |  |  |  |  |
| Websites and forums informing about drug use |  |  |  |  |  |  |
| Training youth workers and teachers |  |  |  |  |  |  |
| Training the party scene’s staff  in dealing with drug use |  |  |  |  |  |  |
| MSM (men who have sex with men) counseling regarding their drug use. |  |  |  |  |  |  |
| Counseling and support “on site”  (festival, club, waiting in line, etc.) |  |  |  |  |  |  |
| Encouraging responsible drug use  (“Safer Use”) and accepting drug counselling |  |  |  |  |  |  |
| Drug education in schools |  |  |  |  |  |  |

**19. What are your expectations from a prevention program/offer of help or what would you wish from one?**

If you would like to receive the results of the survey and/or wish to participate in the raffle, please state your email address in the list provided by one of our team members. You can also write an email to:

**drugsurvey@charite.de**

Would you like to tell us something?

Some information on drug use in Berlin can be found on the next page.

Some information on drug use in Berlin can be found on the next page.

The following graph is based on results[[1]](#footnote-1) of a German-wide survey on drug use. It shows how many Berliners have at least once used a certain drug in 2012 (12-month prevalence). Different age groups are distinguished.

This gives you an insight into which drugs are most widespread in your age group and how many Berliners use drugs in general.

|  |
| --- |
|  |
|  |
|  |

None

Cannabis

Ecstasy

Cocaine

|  |  |
| --- | --- |
|  |  |

**Thank you very much for your participation!**

1. Senatsverwaltung für Gesundheit und Soziales (2014): Drogen und Sucht in Berlin, Situationsbericht 2014 [↑](#footnote-ref-1)
